# Supplementary material
Source: HighWire-hosted journal article supplement (http://www.ajnr.org/highwire/filestream/52695/field_highwire_adjunct_files/0/14-01301.pdf)
Supplement: 14-01301.pdf [file 14-01301.pdf]

**On-line Table 1: Comparison of the outcomes of different types of surgical procedures for IIH**

|                                     | ONSF                                                | CSFD            | Venous Stenting |
|-------------------------------------|-----------------------------------------------------|-----------------|-----------------|
| No. of cases                        | 712                                                 | 435             | 136             |
| No. of eyes                         | 1153                                                | NR              | NR              |
| % of female                         | 82%                                                 | 85%             | 88%             |
| % of male                           | 18%                                                 | 15%             | 12%             |
| Mean age (range)                    | 32.4 (4.4–74)                                       | 31.9 (6–68 mo)  | 34.5 (10–64)    |
| Mean CSF pressure (range)           | 29.3 (13–70)                                        | 41.4 (29–60)    | 34.3 (22–73)    |
| Mean BMI                            | NR                                                  | 30.99 (23–52.5) | 34 (22–73)      |
| % of primary surgery                | 89%                                                 | 86%             | 73%             |
| Presenting symptoms                 |                                                     |                 |                 |
| Headache (P)                        | 155/259 (60%)                                       | 346/435 (80%)   | 121/136 (89%)   |
| Papilledema (P)                     | 278/279 (100%)                                      | 277/380 (73%)   | 108/121 (89%)   |
| Visual changes <sup>a</sup>         | 1066/1153 (92%)                                     | 215/370 (58%)   | 78/120 (65%)    |
| Visual field changes (E)            | 380/442 (86%)                                       |                 |                 |
| Others                              |                                                     | 79/435 (18%)    |                 |
| Symptom Resolution                  |                                                     |                 |                 |
| Headache                            | 56/127 (44%)                                        | 231/287 (80%)   | 101/121 (83%)   |
| Papilledema                         | 76/95 (80%)                                         | 107/153 (70%)   | 104/108 (98%)   |
| Visual changes                      | I, 152/257 (59%); S/I, 1011/1066 (95%) <sup>b</sup> | 104/193 (54%)   | 40/51 (78%)     |
| Visual field changes                | 470/688 (68%)                                       |                 |                 |
| Mean follow-up (mo)                 | 21.0 (0–160)                                        | 41 (1–278)      | 22.9 (1–136)    |
| No. of repeat/subsequent procedures | 100/712 (14.86%)                                    | 428             | 14/136 (10.3%)  |
| Complication rates                  | 128/712 (18%)                                       | 176/435 (40.5%) | 10/136 (7.4%)   |
| Major                               | 11/712 (1.5%)                                       | 33/435 (7.6%)   | 4/136 (2.9%)    |
| Minor                               | 117/712 (16.4%)                                     | 143/435 (32.9%) | 6/136 (4.4%)    |
| Revision reasons                    |                                                     |                 |                 |
| Shunt failure                       |                                                     | 46 (11%)        |                 |
| Shunt obstructions                  |                                                     | 175 (41%)       |                 |
| Shunt infections                    |                                                     | 25 (6%)         |                 |
| Low-pressure headache               |                                                     | 64 (15%)        |                 |
| Radicular pain                      |                                                     | 11 (3%)         |                 |

**Note:**—CSFD indicates CSF-diversion procedure; P, patients; E, eyes; NR, not reported.

<sup>a</sup> Visual changes are calculated in terms of eyes for ONSF and in terms of patients for CSFD and stenting.

<sup>b</sup> I indicates improved, S/I, stable or improved; improved on the basis of eyes with vision <20/20 for ONSF.

**On-line Table 2: ONSF summary**

| Studies                                   | No. of Cases (M/F) | Mean Age (Range), y | Follow-Up (Range), mo | Mean BMI, kg/m <sup>2</sup> | CSF Opening Pressure, cm H <sub>2</sub> O |              |      | Surgery   |            | Post-ONSF Symptoms |                                     |       |       | Subsequent Procedures (n) |          |         |                                                                                             |    |
|-------------------------------------------|--------------------|---------------------|-----------------------|-----------------------------|-------------------------------------------|--------------|------|-----------|------------|--------------------|-------------------------------------|-------|-------|---------------------------|----------|---------|---------------------------------------------------------------------------------------------|----|
|                                           |                    |                     |                       |                             | No. of Eyes                               | Range        | Mean | Bilateral | Unilateral | Primary            | Presenting Symptoms                 | HA    | PAP   |                           | VAC      |         |                                                                                             |    |
|                                           |                    |                     |                       |                             |                                           |              |      |           |            |                    |                                     |       |       |                           | Improved | Stable  |                                                                                             |    |
| Brouman et al., 1988 <sup>23</sup>        | 6 (0/6)            | 10                  | 38.5 (28–62)          | (4–11)                      | NR                                        | NR           | NR   | 4         | 2          | 4                  | HA, NR; PAP, 6; VAC, 10; VFC, NR    | NR/NR | 4/6   | 3/10                      | 10/10    | NR/NR   | Transient diplopia (1); transient atonic pupil (1)                                          | NR |
| Corbett et al., 1988 <sup>24</sup>        | 28 (8/20)          | 40                  | 29.3 (14–62)          | 26.9 (0–90)                 | NR                                        | NR           | NR   | 12        | 16         | 26                 | HA, 17; PAP, 28; VAC, 40; VFC, 38   | 11/17 | 24/28 | 12/40                     | 34/40    | 21/38   | CSF diversion (2)                                                                           |    |
| Sergott et al., 1988 <sup>25</sup>        | 23 (0/22)          | 29                  | 38.1 (18–63)          | 21.5 (3–45)                 | NR                                        | NR           | NR   | 6         | 17         | 17                 | HA, 17; PAP, 23; VAC, 29; VFC, 29   | 13/17 | 12/23 | 21/29                     | 28/29    | 29/29   | Repeat ONSD (2)                                                                             |    |
| Spoor et al., 1991 <sup>26</sup>          | 35 (4/31)          | 69                  | 32.3 (6–72)           | 18.1 (2–48)                 | NR                                        | NR           | NR   | 21        | 14         | 33                 | HA, 7; PAP, 35; VAC, 69; VFC, 69    | NR/7  | NR/35 | 29/69                     | 69/69    | 68/69   | Repeat ONSD (6)                                                                             |    |
| Chronic cases                             | 18 (5/13)          | 32                  | 32.7 (7–57)           | 14.6 (3–46)                 | NR                                        | NR           | NR   | 13        | 5          | 13                 | HA, 3; PAP, 18; VAC, 32; VFC, 24    | NR/3  | NR/18 | 9/32                      | 32/32    | 7/24    | Repeat ONSD (1)                                                                             |    |
| Kelman et al., 1991 <sup>27</sup>         | 12 (1/11)          | 15                  | 38 (31–48)            | 31 (3–72)                   | NR                                        | NR           | NR   | 3         | 9          | 0                  | HA, 7; PAP, 12; VAC, 24; VFC, 24    | 6/7   | NR/12 | 15/24                     | 24/24    | 21/24   | Repeat ONSD (1)                                                                             |    |
| Kelman et al., 1992 <sup>28</sup>         | 17 (2/15)          | 21                  | 40 (16–73)            | 17 (11–26)                  | NR                                        | NR           | NR   | 4         | 13         | 13                 | HA, 10; PAP, 17; VAC, 21; VFC, 21   | 9/10  | 7/17  | 14/21                     | 20/21    | 20/21   | None                                                                                        |    |
| Acheson et al., 1994 <sup>29</sup>        | 11 (4/7)           | 15                  | 37.1 (23–53)          | 24 (12–84)                  | NR                                        | NR           | NR   | 4         | 7          | 7                  | HA, NR; PAP, NR; VAC, 15; VFC, 15   | NR/NR | NR/NR | 8/15                      | 13/15    | 8/15    | CSF diversion (4), subtemporal decompression (1)                                            |    |
| Goh et al., 1997 <sup>20</sup>            | 19 (6/13)          | 29                  | 33.1 (16–52)          | 15.7 (1–50)                 | NR                                        | NR           | NR   | 10        | 9          | 19                 | HA, NR; PAP, NR; VAC, 29; VFC, 21   | NR/NR | NR/NR | 4/29                      | 26/29    | 10/21   | Repeat ONSD (4)                                                                             |    |
| Banta and Farris, 2000 <sup>31</sup>      | 86 (13/73)         | 158                 | 32.1                  | 20 (1–108)                  | NR                                        | NR           | NR   | 72        | 14         | 86                 | HA, 6; PAP, 86; VAC, 158; VFC, 81   | 8/61  | NR/86 | NR/158                    | 148/158  | 71/81   | Repeat ONSD + CSF diversion (4), CSF diversion (1), presumed traumatic optic neuropathy (1) |    |
| Thuente and Buckley, 2005 <sup>32</sup>   | 12 (6/6)           | 17                  | 10.1 (4.4–16)         | 39.6 (2.4–105.3)            | NR                                        | 33 (13–47)   | NR   | 5         | 7          | 12                 | HA, 8; PAP, 12; VAC, 17; VFC, 17    | 5/8   | 12/12 | 7/17                      | 17/17    | 6/17    | None                                                                                        |    |
| Knapp and Sampath, 2005 <sup>33</sup>     | 13 (4/9)           | 23                  | 26.5 (14–49)          | 9.6 (1–32)                  | NR                                        | NR           | NR   | 10        | 3          | 11                 | HA, NR; PAP, NR; VAC, 27; VFC, 24   | NR/NR | NR/NR | 4/27                      | 27/27    | 18/24   | None                                                                                        |    |
| Chandrasekaran et al., 2006 <sup>34</sup> | 32 (3/29)          | 51                  | 33.4 (17–65)          | 27.6 (0–120)                | NR                                        | NR           | NR   | 18        | 14         | 25                 | HA, NR; PAP, 32; VAC, 31; VFC, 39   | NR/NR | NR/32 | 13/31                     | 30/31    | 13/39   | Transient diplopia (3), anisocoria (2), disc hemorrhage (1)                                 |    |
| Gupta et al., 2007 <sup>35</sup>          | 18 (4/14)          | NR                  | 35.8 (30–42)          | (3–45)                      | 24.4                                      | 26.8 (25–70) | NR   | 0         | 18         | 15                 | HA, 18; PAP, NR; VAC, 36; VFC, NR   | NR/18 | NR/NR | 30/36                     | 36/36    | NR/NR   | Synechiae (2)                                                                               |    |
| Nithyanandam et al., 2008 <sup>36</sup>   | 21 (6/15)          | 41 <sup>a</sup>     | 29.5 (18–48)          | (3–29)                      | NR                                        | NR           | NR   | 19        | 2          | 21                 | HA, NR; PAP, NR; VAC, 34; VFC, 34   | NR/NR | NR/NR | 17/34                     | 32/34    | 22/34   | Transient pupillary atony (3), transient diplopia (1), orbital cellulitis (1)               |    |
| Alsuhaibani et al., 2011 <sup>22</sup>    | 78 (12/56)         | 88                  | 32 (13–57)            | 12 (2 wk–12 mo)             | NR                                        | NR           | NR   | 10        | 68         | 78                 | HA, NR; PAP, NR; VAC, NR; VFC, NR   | NR/NR | NR/NR | NR/NR                     | NR/NR    | NR/NR   | Transient diplopia (3), large cyst formation at the site of the surgery (1)                 |    |
| Moreau et al., 2014 <sup>37</sup>         | 236 (NR)           | 455                 | NR                    | 18.7 (1 wk–120 mo)          | NR                                        | NR           | NR   | NR        | NR         | NR                 | HA, NR; PAP, NR; VAC, 448; VFC, 227 | NR/NR | NR/NR | 75/448                    | 429/448  | 142/227 | Diplopia (15), dellien (2), esotropia (4), exotropia (2)                                    |    |
| Pineles and Volpe, 2013 <sup>38</sup>     | 37 (5/32)          | 50                  | 33 (19–74)            | 48.2 (1–160)                | NR                                        | NR           | NR   | 13        | 24         | –                  | HA, NR; PAP, NR; VAC, 37; VFC, 16   | NR/NR | NR/NR | 8/37                      | 28/37    | 6/16    | Tonic pupil (2), conjunctival abscess (1), diplopia (1)                                     |    |
| Sencer et al., 2014 <sup>39</sup>         | 10 (1/9)           | 10                  | 34.1 (9–49)           | 28.4 (8–55)                 | NR                                        | NR           | NR   | 0         | 10         | 9                  | HA, 7; PAP, 9; VAC, 9; VFC, 9       | 4/7   | 7/9   | 7/9                       | 8/9      | 8/9     | None                                                                                        |    |

**Note:**—HA, indicates headache; PAP, papilledema; VAC, visual acuity changes; VFC, visual field changes; M, male; F, female; NR, not reported; ONSD, optic nerve sheath decompression. <sup>a</sup> Seven eyes were excluded from analysis due to no light perception.

**On-line Table 3: CSF diversion summary**

| Studies                               | No. of Cases (M/F) | Mean Age (Range or SD), y | Follow-Up (Range or SD), mo | Mean BMI, kg/m <sup>2</sup> (Range) | CSF Opening Pressure, cm H <sub>2</sub> O (Range) | Primary Surgery | Presenting Symptoms |       |       | Post-CSF Diversion Symptoms |       |                  | Type of Shunt                           | Subsequent Procedures | No. of Patients with Revisions | Complications             |        |  |
|---------------------------------------|--------------------|---------------------------|-----------------------------|-------------------------------------|---------------------------------------------------|-----------------|---------------------|-------|-------|-----------------------------|-------|------------------|-----------------------------------------|-----------------------|--------------------------------|---------------------------|--------|--|
|                                       |                    |                           |                             |                                     |                                                   |                 | HA                  | PAP   | VAC   | HA                          | PAP   | VAC              |                                         |                       |                                | Shunt Revision Reasons    | Others |  |
| Johnston et al, 1988 <sup>40</sup>    | 36 (10/26)         | 24.7 (6 mo–54 y)          | NR                          | NR                                  | NR                                                | NR              | NR/29               | NR/34 | NR/24 | NR/24                       | NR/24 | LPS + VPS        | 50 Revisions                            | 18                    | SO, 24; SI, 8; LPH, 14; RP, 1  | Others, 3                 |        |  |
| Rosenberg et al, 1993 <sup>41</sup>   | 37 (NR)            | NR                        | 30.9 (1–180)                | NR                                  | NR                                                | NR              | NR/7                | NR/NR | 13/34 | 13/34                       | 13/34 | LPS + VPS        | 56 Revisions                            | 19                    | SF, 31; SI, 3; LPH, 14; RP, 2  | AP, 3; OC, 2; CSF leak, 1 |        |  |
| Eggenberger et al, 1996 <sup>8</sup>  | 27 (3/24)          | 28 (8–51)                 | 77 (21–278)                 | NR                                  | NR                                                | NR              | 18/18               | 9/14  | 10/NR | 10/NR                       | 10/NR | LPS              | 66 Revisions                            | 15                    | SO, 43; SI, 1; LPH, 10; RP, 3  | AP, 1; CM, 3              |        |  |
| Burgett et al, 1997 <sup>42</sup>     | 30 (2/28)          | 32.9 (10–68)              | 34.9 (0–143)                | NR                                  | NR                                                | NR              | 14/17               | 15/16 | 6/10  | 6/10                        | 6/10  | LPS              | 126 Revisions                           | 19                    | SF, 13; SI, 1; LPH, 2; RP, 1   | CSF fistula, 1            |        |  |
| Tulipan et al, 1998 <sup>43</sup>     | 7 (NR)             | NR                        | 9 (4–17)                    | NR                                  | NR                                                | 5               | 6/7                 | 5/7   | NR/NR | NR/NR                       | NR/NR | S-VPS            | None                                    | None                  | None                           | None                      |        |  |
| Maher et al, 2001 <sup>44</sup>       | 13 (3/10)          | 31.5 (6–54)               | 12.4 (1–38)                 | NR                                  | NR                                                | 0               | 0/4                 | NR/NR | 5/11  | 5/11                        | 5/11  | S-VPS            | 3 Revisions                             | 3                     | SO, 3                          | None                      |        |  |
| McGinn et al, 2004 <sup>45</sup>      | 42 (10/32)         | 37 (±10)                  | 49 ± 31                     | NR                                  | NR                                                | NR              | 40/42               | NR/25 | NR/15 | NR/15                       | NR/15 | LPS + VPS        | 84 Revisions                            | NR                    | SO, 55; SI, 4; LPH, 16; RP, 4  | CM, 5; TH, 3              |        |  |
| Bynke et al, 2004 <sup>54</sup>       | 17 (5/12)          | 34 (13–63)                | 78 (216–153.6)              | 30.99 (23–52.5)                     | 39.4                                              | 16              | 15/15               | 16/16 | 3/8   | 3/8                         | 3/8   | VPS              | 9 Revisions                             | 7                     | SO, 6; SI, 2                   | SM, 1                     |        |  |
| Woodworth et al, 2005 <sup>58</sup>   | 21 (4/17)          | 42 (±10)                  | 20 ± 17                     | NR                                  | NR                                                | NR              | 21/21               | NR/8  | NR/5  | NR/5                        | NR/5  | VPS              | 32 Revisions                            | 8                     | SO, 21; LPH, 6                 | CM, 1; CSF leak, 1        |        |  |
| Abu-Serieh et al, 2007 <sup>55</sup>  | 9 (4/5)            | 26.4 (4–63)               | 44.3 (6–110)                | NR                                  | NR                                                | 9               | 9/9                 | 3/5   | 2/2   | 2/2                         | 2/2   | S-VPS            | 9 Revisions                             | 6                     | SO, 1; SI, 5                   | SM, 1; VD, 2              |        |  |
| Thambisetty et al, 2007 <sup>47</sup> | 16 (0/16)          | 23.8 (14–39)              | NR                          | NR                                  | 54.1 (29–60)                                      | 16              | 16/16               | NR/16 | 14/16 | 14/16                       | 14/16 | LPS, VPS, + ONSF | NR                                      | None                  | None                           | None                      |        |  |
| Tarnaris et al, 2011 <sup>48</sup>    | 34 (2/32)          | 35 (27.1–42.9)            | 28.9 (±31.8)                | NR                                  | 39.4 (29.1–49.7)                                  | 29              | 20/29               | 10/24 | 12/29 | 12/29                       | 12/29 | LPS + VPS        | NR                                      | 12                    | SO, 1; SI, 1; LPH, 2           | AP, 1; SM, 1; CSF leak, 1 |        |  |
| Abubaker et al, 2011 <sup>46</sup>    | 18 (NR)            | avail/NR(25–65)           | 48 (6–96)                   | NR                                  | NR                                                | NR              | 11/18               | 11/17 | 11/11 | 11/11                       | 11/11 | LPS              | 12 Revisions                            | 10                    | SO, 3                          | SM, 3; CM, 6              |        |  |
| Abubaker et al, 2011 <sup>46</sup>    | 10 (NR)            | avail/NR(25–65)           | 48 (6–96)                   | NR                                  | NR                                                | NR              | 9/10                | 6/7   | 4/4   | 4/4                         | 4/4   | VPS              | 3 Revisions                             | 2                     | NR                             | CM, 3                     |        |  |
| Sinclair et al, 2011 <sup>59</sup>    | 53 (3/50)          | 30.3 (±8.5)               | (6–24)                      | NR                                  | 39.5 (±8.2)                                       | 53              | 8/35                | 14/27 | 15/33 | 15/33                       | 15/33 | LPS + VPS        | 74 Revisions                            | 27                    | SO, 12                         | CM, 2; SD, 5; others, 8   |        |  |
| El-Saadany et al, 2012 <sup>57</sup>  | 22 (4/18)          | 28.5 (20–38)              | (1–12)                      | NR                                  | NR                                                | 22              | 22/22               | 18/20 | NR/NR | NR/NR                       | NR/NR | LPS              | 6 Revisions                             | 6                     | SO, 6                          | None                      |        |  |
| Yadav et al, 2012 <sup>56</sup>       | 24 (2/22)          | 39 (7–58)                 | 51 (18–137)                 | NR                                  | NR                                                | NR              | 22/24               | NR/24 | 10/18 | 10/18                       | 10/18 | LPS              | 2 Revisions                             | 2                     | SF, 2                          | None                      |        |  |
| Huang et al, 2014 <sup>60</sup>       | 19 (1/18)          | 29 (±13)                  | 21.2 (1–44)                 | NR                                  | NR                                                | 14              | NR/2                | NR/NR | 9/17  | 9/17                        | 9/17  | VPS              | 4 VPS revisions, 3 replacements, 1 ONSF | NR                    | NR                             | NR                        |        |  |

**Note:**—LPS indicates lumboperitoneal shunt; VPS, ventriculoperitoneal shunt; S-VPS, stereotactic ventriculoperitoneal shunt; SF, shunt failure; SO, shunt obstruction; SI, shunt infection; LPH, low-pressure headache; RP, radicular pain; AP, abdominal pain; CM, catheter migration; OC, operative complications; TH, tonsillar herniation; SM, shunt malposition; VD, valve dysfunction; SD, shunt disconnection; HA, headache; PAP, papilledema; VAC, visual acuity changes; VFC, visual field changes; M, male; F, female; NR, not reported.

**On-line Table 4: Venous stenting summary**

| Studies                               | No. of Stenting Cases (n) | M/F  | Mean Age (Range), y | Follow-Up (Range), mo | Mean BMI, kg/m <sup>2</sup> (Range) | CSF Opening Pressure, cm H <sub>2</sub> O (Range) | Primary Surgery | Pre-stent Symptoms                |       | Poststenting Symptoms |       | Mean Pressure Gradient, mm Hg (Range) |                              | Location of Stent Placement | Complications (n)       | Subsequent Procedure (n)                          |                          |
|---------------------------------------|---------------------------|------|---------------------|-----------------------|-------------------------------------|---------------------------------------------------|-----------------|-----------------------------------|-------|-----------------------|-------|---------------------------------------|------------------------------|-----------------------------|-------------------------|---------------------------------------------------|--------------------------|
|                                       |                           |      |                     |                       |                                     |                                                   |                 | HA                                | PAP   | VAC                   | VFC   | Pre-stent                             | Post-stent                   |                             |                         |                                                   |                          |
| Owler et al, 2003 <sup>16</sup>       | 4 (9)                     | 1/3  | 27.3 (7–38)         | 9.25 (5–12)           | 30 (23–38)                          | 28.7 (22–35); NR in 1                             | 1               | HA, 4; PAP, 4; VAC, 4; VFC, 3     | 4/4   | 4/4                   | 4/4   | 3/3                                   | 18.8 (12–25)                 | 0.25 (0–1)                  | RTS, 3; LTS, 1          | None                                              | None                     |
| Higgins et al, 2003 <sup>17</sup>     | 12                        | 0/12 | 33 (19–52)          | 14.1 (2–26)           | 36.9 (29–45)                        | 33.7 (25–46)                                      | 7               | HA, 12; VFC, 8; VAC, 12; VFC, NR  | 7/12  | 5/8                   | 7/12  | NR/NR                                 | 18.9 (8–37)                  | 5.75 (2–15)                 | NR                      | None                                              | Contralateral stents (2) |
| Donnet et al, 2008 <sup>7</sup>       | 10                        | 2/8  | 41.8 (28–60)        | 17 (6–36)             | 27.3 (22–37)                        | 40.2 (29–59)                                      | 10              | HA, 10; PAP, 10; VAC, 10; VFC, NR | 8/10  | 10/10                 | NR/10 | NR/NR                                 | 19.1 (12–34)                 | NR                          | RTS, 7; LTS, 2; B/L, 1  | None                                              | Contralateral stents (1) |
| Bussière et al, 2010 <sup>18</sup>    | 10 (13)                   | 0/10 | (16–65)             | 20.1 (4–60)           | 35.9 (27.2–47.4)                    | (25–50)                                           | 10              | HA, 10; PAP, 9; VAC, 8; VFC, 4    | 10/10 | 9/9                   | 7/8   | NR/4                                  | 28.3 (11–50); >10 in 2 cases | 11.25 (2–23); NR in 2       | RTS, 8; LTS, 2          | None                                              | CSF diversion [VPS] (1)  |
| Ahmed et al, 2011 <sup>19</sup>       | 52                        | 5/47 | 34 (10–64)          | 24 (2–108)            | >30 in 47                           | 32.2 (25–73); NR in 9                             | 43              | HA, 43; PAP, 46; VAC, 13; VFC, 30 | 40/43 | 46/46                 | 9/13  | 23/30                                 | 19.1 (4–41)                  | 0.6 (0–14)                  | RTS, 36; LTS, 16; NR, 4 | Subdural hematoma (2), transient hearing loss (2) | Repeat stent (6)         |
| Albuquerque et al, 2011 <sup>20</sup> | 15 (18)                   | 3/12 | 31 (12–51)          | 20 (2–40)             | NR                                  | NR                                                | NR              | HA, 15; PAP, NR; VAC, NR; VFC, NR | 12/15 | NR/NR                 | NR/NR | NR/NR                                 | NR                           | NR                          | RTS, 9; LTS, 6          | Retropertoneal hematoma (1)                       | None                     |
| Kumpe et al, 2012 <sup>21</sup>       | 18                        | 6/12 | 37.9 (16–62)        | 43.7 (1–136)          | 31.6 (22.6–38)                      | 37.9 (25–55); NR in 6                             | 8               | HA, 12; PAP, 16; VAC, 17; VFC, NR | 10/12 | 15/16                 | NR/17 | NR/NR                                 | 21.1 (10.5–39)               | 2.5 (0–7)                   | RTS, 12; LTS, 7         | Subdural hematoma (2), UTI (1), syncope (1)       | Repeat stent (2)         |
| Fields et al, 2013 <sup>5</sup>       | 15                        | 0/15 | 34 (20–56)          | 14 (1–49)             | 39 (30–73)                          | NR                                                | 9               | HA, 15; PAP, 15; VAC, 14; VFC, NR | 10/15 | 15/15                 | 13/14 | NR/NR                                 | 24 (13–40)                   | 4 (0–9)                     | RTS, 8; LTS, 4; B/L, 3  | Femoral pseudoaneurysm (1)                        | CSF diversions [VPS] (2) |

**Note:**—M indicates male; F, female; HA, headache; PAP, papilledema; VAC, visual acuity changes; VFC, visual field changes; RTS, right transverse sinus; B/L, bilateral; LTS, left transverse sinus; NR, no data; UTI, urinary tract infection; VPS, ventriculoperitoneal shunt.
